# Supplementary material for: Gamma-Tocotrienol Modulates Total-Body Irradiation-Induced Hematopoietic Injury in a Nonhuman Primate Model
Source: MDPI journal article supplement (doi:10.3390/ijms232416170), 2022-12-18
Supplement: s1 [file s1]

**Gamma-tocotrienol modulates total-body irradiation-induced hematopoietic injury in a  
nonhuman primate model**

Tarun K. Garg <sup>1,a</sup>, Sarita Garg <sup>2, 3,a,b</sup>, Isabelle R. Miousse <sup>3</sup>, Stephen Y. Wise <sup>4,5</sup>, Alana D. Carpenter <sup>4,5</sup>, Oluseyi O. Fatanmi <sup>4,5</sup>, Frits van Rhee <sup>1</sup>, Vijay K. Singh <sup>4,5,\*</sup> and Martin Hauer-Jensen <sup>2,\*</sup>

<sup>1</sup> UAMS Myeloma Center, University of Arkansas for Medical Sciences, Little Rock, AR;

<sup>2</sup> Division of Radiation Health, Department of Pharmaceutical Sciences, University of Arkansas

for Medical Sciences, Little Rock, AR; <sup>3</sup> Department of Biochemistry and Molecular Biology,

University of Arkansas for Medical Sciences, Little Rock, AR; <sup>4</sup> Division of Radioprotectants,  
Department of Pharmacology and Molecular Therapeutics, F. Edward Hébert School of

Medicine, Uniformed Services University of the Health Sciences, Bethesda, MD; <sup>5</sup> Armed Forces  
Radiobiology Research Institute, Uniformed Services University of the Health Sciences,  
Bethesda, MD

<sup>a</sup>These authors contributed equally

<sup>b</sup>Present address: Department of Biochemistry and Molecular Biology, University of Arkansas  
for Medical Sciences, Little Rock, AR-72205

\*Communicating author:  
Martin Hauer-Jensen, MD, PhD  
Division of Radiation Health  
4301 West Markham, Slot 522-10  
Little Rock, AR 72205  
Phone: 501-686-7912  
Fax: 501-421-0022  
E-mail: [mhjensen@uams.edu](mailto:mhjensen@uams.edu)

Co-communicating author: Vijay K. Singh, [vijay.singh@usuhs.edu](mailto:vijay.singh@usuhs.edu), +1-301-295-2347

## Supplementary Tables and Figures:

### Supplementary Tables:

| <b>Supplementary Table S1. Antibodies used for the analysis of NHP-BM samples</b> |                          |              |                         |
|-----------------------------------------------------------------------------------|--------------------------|--------------|-------------------------|
| <b>Antibody</b>                                                                   | <b>Fluorochrome</b>      | <b>Clone</b> | <b>Manufacturer</b>     |
| Live/dead                                                                         | eFluor™ 506              | N/A          | eBioscience™            |
| CD3                                                                               | V450                     | SP34-2       | BD Biosciences          |
| CD4                                                                               | PE-Alexa Fluor 700       | S3.5         | ThermoFisher Scientific |
| CD8                                                                               | APC                      | LT8          | ThermoFisher Scientific |
| CD25                                                                              | Super Bright 702 (SB702) | CD25-4E3     | eBioscience™            |
| CD20                                                                              | APC-H7                   | 2H7          | BD Biosciences          |
| CD56                                                                              | Super Bright 600 (SB600) | TULY56       | eBioscience™            |
| CD16                                                                              | Super Bright 645 (SB645) | 3G8          | eBioscience™            |
| CD34                                                                              | PE                       | 563          | BD Biosciences          |
| CD45                                                                              | FITC                     | D058-1283    | BD Biosciences          |
| CD11b/Mac1                                                                        | PE-Cy7                   | ICRF44       | BD Biosciences          |

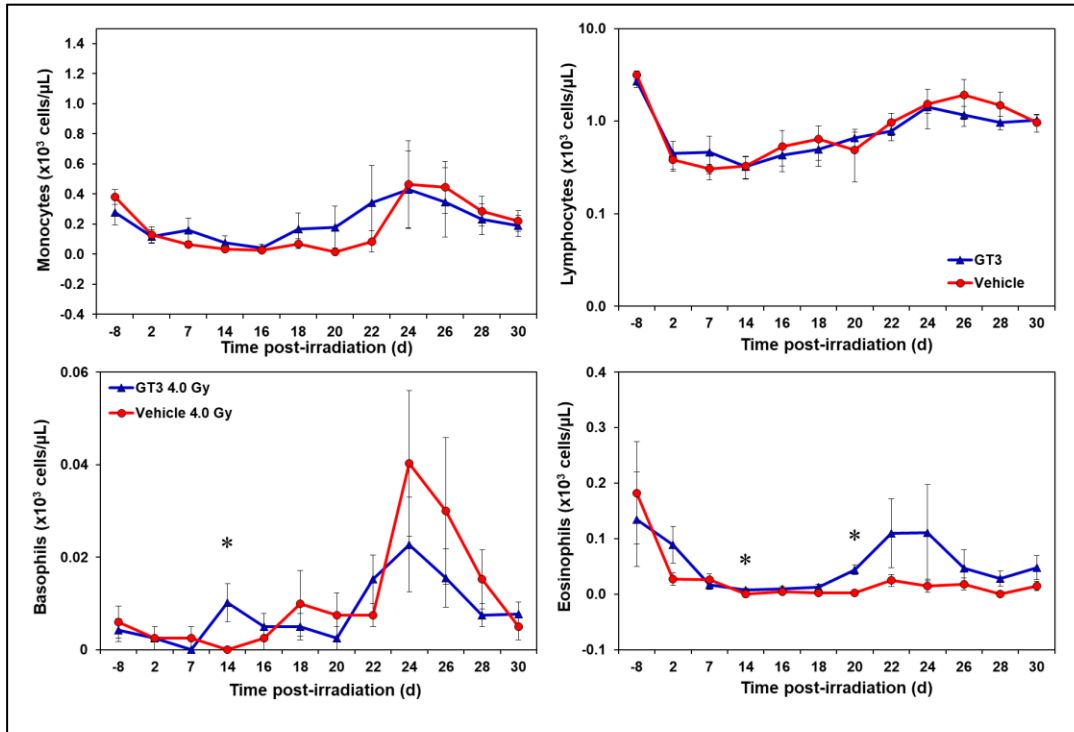

**Supplementary Figure S1. Effects of GT3 on complete blood count (CBC) in NHPs**

**exposed to 4 Gy TBI.** NHPs received GT3 (37.5 mg/kg) or vehicle 24 h prior to irradiation.

Blood was collected at various time points. Cells were counted using a Bayer Advia-120 cell

counter. Data are expressed as mean  $\pm$  SEM. \*The difference between GT3-treated and vehicle-

treated groups was significant when equal variance between groups was assumed (\* $p < 0.05$ ).

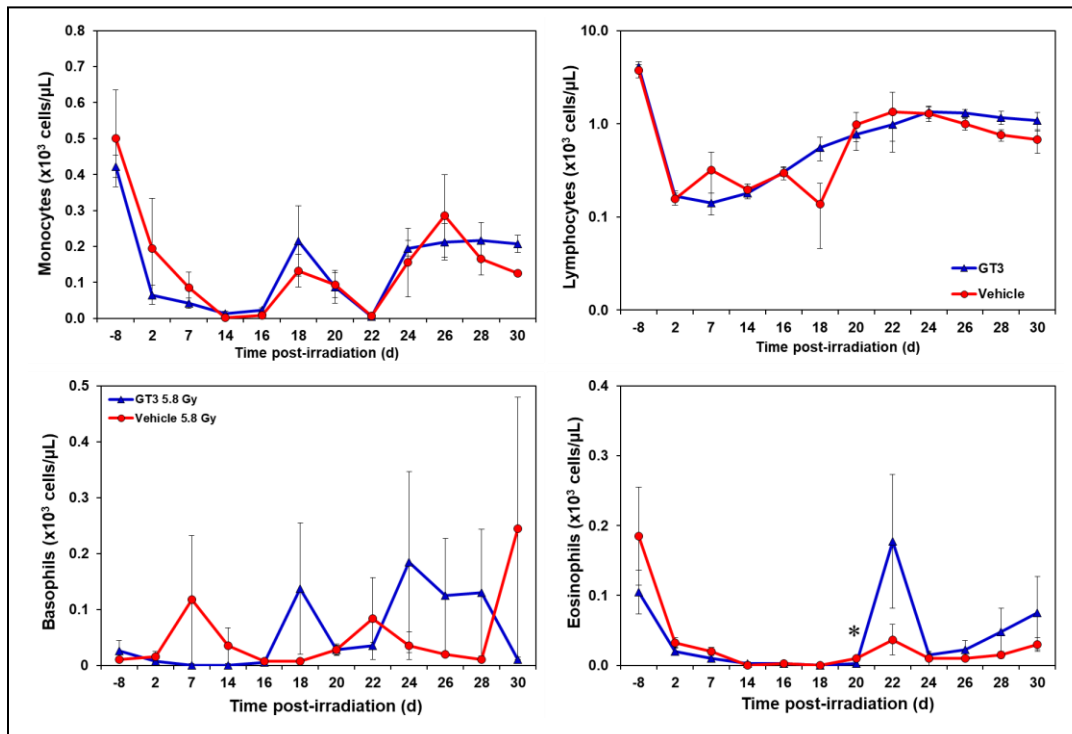

**Supplementary Figure S2. Effects of GT3 on complete blood count (CBC) in NHPs exposed to 5.8 Gy TBI.** NHPs received GT3 (37.5 mg/kg) or vehicle 24 h prior to irradiation. Blood was collected at various time points. Cells were counted using a Bayer Advia-120 cell counter. Data are expressed as mean  $\pm$  SEM. \*The difference between GT3-treated and vehicle-treated groups was significant when equal variance between groups was assumed (\* $p < 0.05$ ).
